# Supplementary material
Source: MDPI journal article supplement (https://www.mdpi.com/2304-6740/10/6/83)
Supplement: s1 [file s1]

# Supporting Information

## Luminescence and Scintillation in the Niobium Doped Oxyfluoride $\text{Rb}_4\text{Ge}_5\text{O}_9\text{F}_6\text{:Nb}$

Darren Carone,<sup>1</sup> Vladislav V. Klepov,<sup>1</sup> Scott T. Misture,<sup>2</sup> Joseph C. Schaeperkoetter,<sup>2</sup> Luiz G. Jacobsohn,<sup>3</sup> Mina Aziziha,<sup>4</sup> Juliano Schorne-Pinto,<sup>4</sup> Stuart A. J. Thomson,<sup>5</sup> Adrian T. Hines,<sup>1</sup> Theodore M. Besmann,<sup>4</sup> and Hans-Conrad zur Loye\*,<sup>1</sup>

<sup>1</sup>*Department of Chemistry and Biochemistry, University of South Carolina, Columbia, SC 29208, USA*

<sup>2</sup>*Kazuo Inamori School of Engineering, Alfred University, Alfred, NY 14802, USA*

<sup>3</sup>*Department of Materials Science and Engineering, Clemson University, Clemson, SC 29634, USA*

<sup>4</sup>*Nuclear Engineering Program, Department of Mechanical Engineering, University of South Carolina, Columbia, SC 29208, USA*

<sup>5</sup>*Edinburgh Instruments Ltd., 2 Bain Square, Livingston, EH54 7DQ, UK*

\*Corresponding author e-mail: zurloye@mailbox.sc.edu

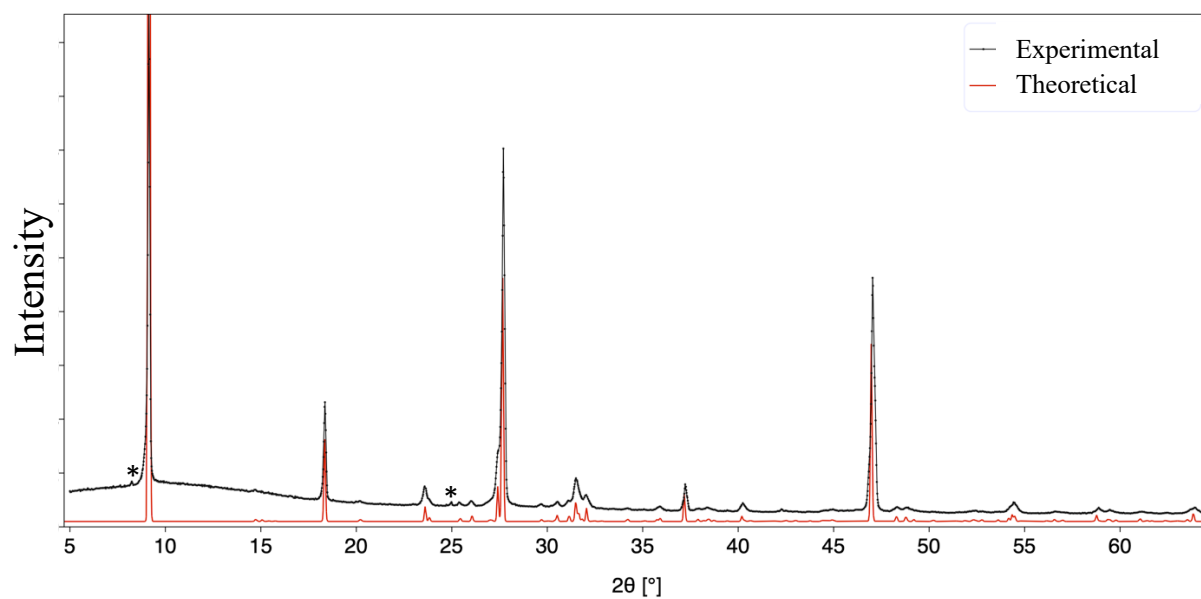

**Figure S1.** Powder X-ray diffraction pattern for  $\text{Rb}_4\text{Ge}_5\text{O}_9\text{F}_6:\text{Nb}$ . \* denote  $K_\beta$  peaks. The experimental and theoretical patterns are shown in black and red, respectively.
